# Supplementary material for: Public Preferences for Social Distancing Behaviors to Mitigate the Spread of COVID-19: A Discrete Choice Experiment
Source: bioRxiv or medRxiv preprint supplement (doi:10.1101/2020.12.12.20248103), 2020-12-14
Supplement: Supplementary file [file media-1.pdf]

**Supplementary Information for:**

**Public Preferences for Social Distancing Behaviors to Mitigate the Spread of COVID-19: A Discrete Choice Experiment**

Authors: Ingrid Eshun Wilson, Aaloke Mody, Ginger McKay, Mati Hlatshwayo, Cory Bradley, Vetta Thompson, Dave V Glidden, Elvin H Geng

Corresponding author: Ingrid Eshun-Wilson  
Email: [i.eshun-wilsonova@wustl.edu](mailto:i.eshun-wilsonova@wustl.edu)

**This PDF file includes:**

Supplementary tables: S1 – S11

**S1 Table: Comparison of survey completers and non-completers**

| Demographic factor |                           | Completed survey (N=2428) | Not completed (N=617) | p-value |
|--------------------|---------------------------|---------------------------|-----------------------|---------|
| Age                | 18-24yrs                  | 126 (6%)                  | 17 (4%)               | <0.001  |
|                    | 25-34yrs                  | 424 (19%)                 | 52 (13%)              |         |
|                    | 35-49yrs                  | 553 (25%)                 | 65 (17%)              |         |
|                    | 50-64yrs                  | 647 (29%)                 | 133 (34%)             |         |
|                    | 65yrs+                    | 469 (21%)                 | 125 (32%)             |         |
| Gender             | Male                      | 667 (30%)                 | 130 (34%)             | 0.390   |
|                    | Female                    | 1536 (69%)                | 248 (65%)             |         |
|                    | Non-conforming/other      | 12 (1%)                   | 3 (1%)                |         |
|                    | No Answer                 | 4 (<1%)                   | 1 (<1%)               |         |
| Race               | Black                     | 127 (6%)                  | 23 (6%)               | 0.610   |
|                    | White                     | 1973 (89%)                | 336 (89%)             |         |
|                    | other                     | 92 (4%)                   | 12 (3%)               |         |
|                    | No answer                 | 27 (1%)                   | 7 (2%)                |         |
| Comorbidities      | No comorbidities          | 1535 (69%)                | 245 (69%)             | 0.84    |
|                    | Respiratory comorbidities | 320 (14%)                 | 39 (7%)               | <0.001  |
|                    | Other comorbidities       | 431 (19%)                 | 78 (14%)              | 0.005   |
|                    | No answer                 | 11 (<1%)                  | 196 (36%)             | <0.001  |
| Income             | < \$20,000                | 97 (4%)                   | 23 (6%)               | 0.046   |
|                    | \$20,000-\$49,000         | 383 (17%)                 | 72 (20%)              |         |
|                    | 50,000-\$99,000           | 871 (39%)                 | 150 (41%)             |         |
|                    | \$100,000 +               | 868 (39%)                 | 117 (32%)             |         |
|                    | No answer                 | 209 (9%)                  | 69 (16%)              |         |

**S2 Table: Main relative utilities (preferences) for social distancing policy features (N=2,428)**

| <b>Attribute</b>            | <b>Utilities</b> | <b>p-value</b> | <b>Low CI</b> | <b>High CI</b> |
|-----------------------------|------------------|----------------|---------------|----------------|
| Duration: 2 vs 1 months     | 0.00             | 0.949          | -0.13         | 0.12           |
| Duration: 3 vs 1 months     | -0.16            | 0.031          | -0.31         | -0.02          |
| Income loss: 15% vs 5%      | -0.72            | 0.000          | -0.86         | -0.57          |
| Income loss: 25% vs 5%      | -1.49            | 0.000          | -1.70         | -1.29          |
| Large gatherings permitted  | -1.43            | 0.000          | -1.67         | -1.18          |
| Social venues open          | 0.05             | 0.451          | -0.08         | 0.17           |
| Outdoor venues open         | 0.50             | 0.000          | 0.39          | 0.61           |
| Schools open                | 0.18             | 0.005          | 0.05          | 0.30           |
| Risk of infection 15% vs 5% | -1.02            | 0.000          | -1.19         | -0.84          |
| Risk of infection 30% vs 5% | -2.89            | 0.000          | -3.23         | -2.54          |

S3 Table & Figure: Main utilities by age category

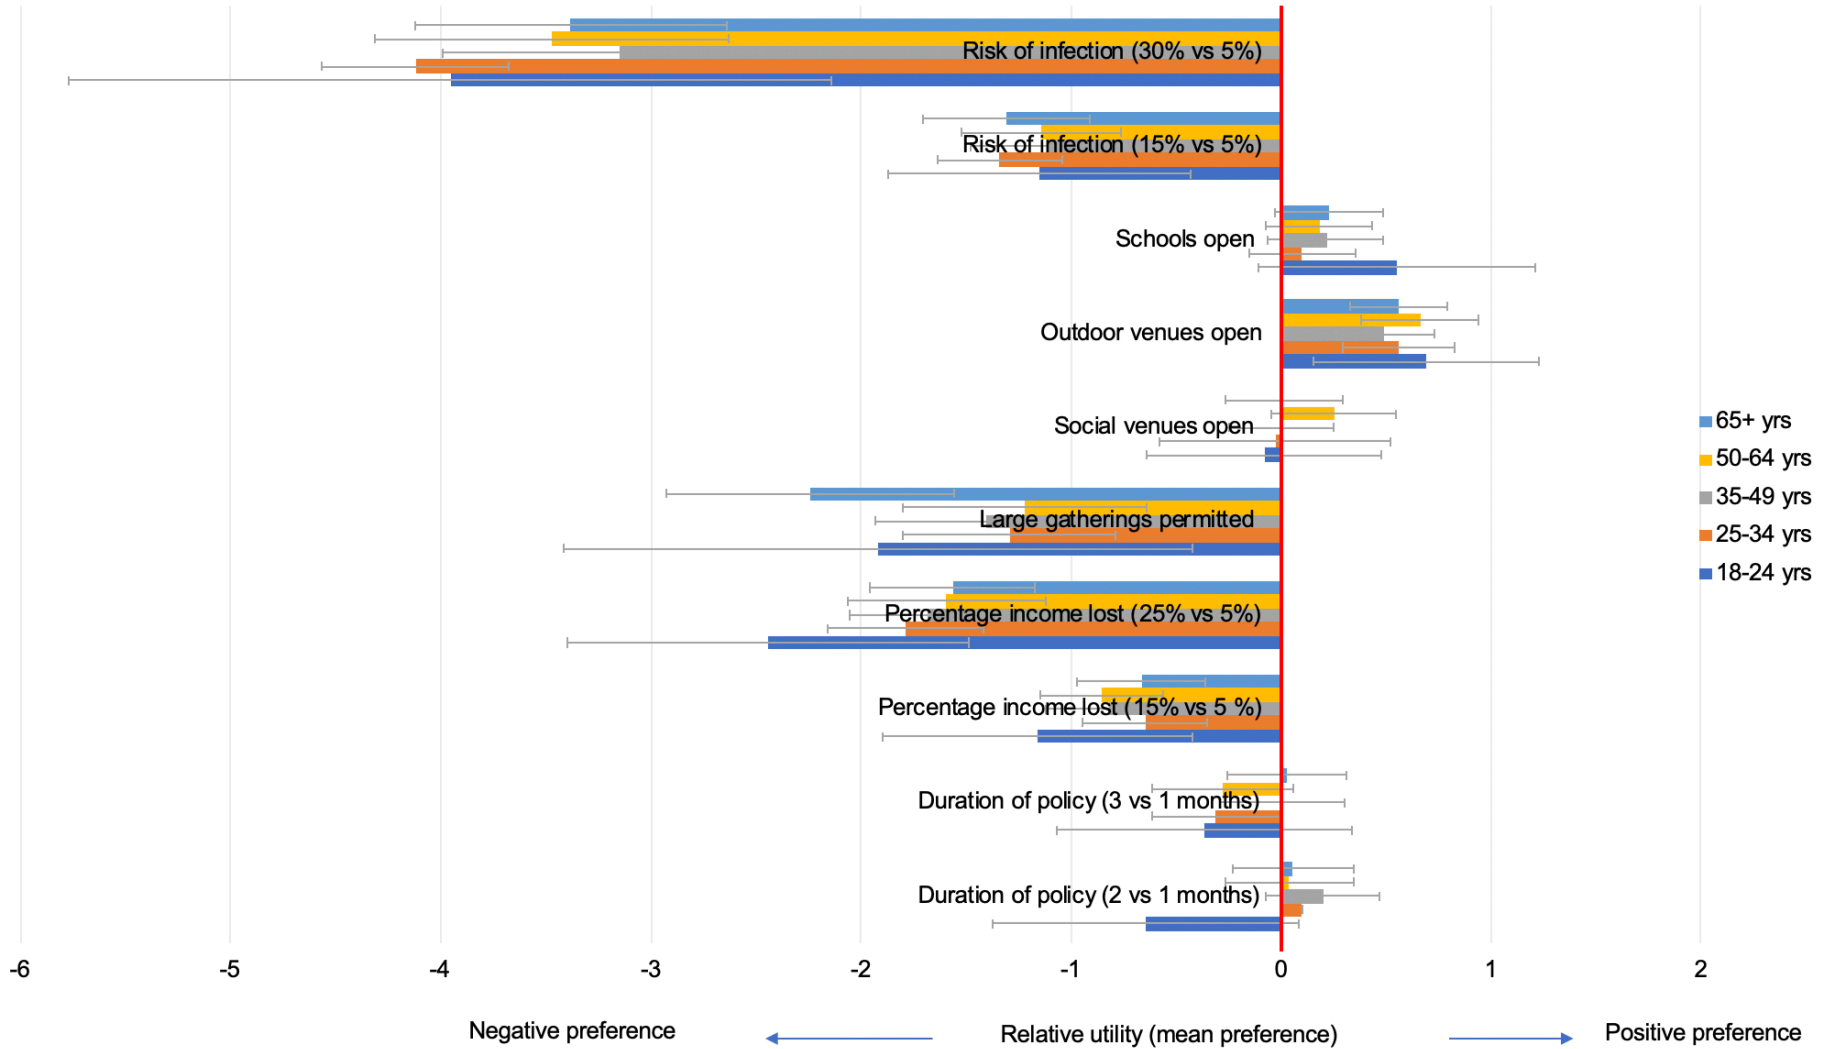

| Attribute                          | 18-24 yrs |        |       | 25-34 yrs |        |       | 35-49 yrs |        |       | 50-64 yrs |        |       | 65+ yrs |        |       |
|------------------------------------|-----------|--------|-------|-----------|--------|-------|-----------|--------|-------|-----------|--------|-------|---------|--------|-------|
|                                    | Utility   | 95% CI |       | Utility   | 95% CI |       | Utility   | 95% CI |       | Utility   | 95% CI |       | Utility | 95% CI |       |
| Duration of policy (2 vs 1 months) | -0.64     | -1.37  | 0.09  | 0.10      | -0.21  | 0.40  | 0.20      | -0.07  | 0.47  | 0.04      | -0.26  | 0.35  | 0.06    | -0.23  | 0.34  |
| Duration of policy (3 vs 1 months) | -0.36     | -1.07  | 0.34  | -0.31     | -0.61  | -0.02 | 0.00      | -0.29  | 0.30  | -0.28     | -0.62  | 0.06  | 0.03    | -0.25  | 0.31  |
| Percentage income lost (15% vs 5%) | -1.16     | -1.90  | -0.42 | -0.65     | -1.02  | -0.27 | -0.82     | -1.12  | -0.52 | -0.85     | -1.15  | -0.56 | -0.67   | -0.97  | -0.36 |
| Percentage income lost (25% vs 5%) | -2.44     | -3.40  | -1.49 | -1.79     | -2.29  | -1.28 | -1.69     | -2.05  | -1.32 | -1.59     | -2.06  | -1.12 | -1.56   | -1.95  | -1.18 |
| Large gatherings permitted         | -1.92     | -3.41  | -0.42 | -1.29     | -1.84  | -0.74 | -1.41     | -1.93  | -0.88 | -1.22     | -1.80  | -0.64 | -2.24   | -2.93  | -1.56 |
| Social venues open                 | -0.08     | -0.64  | 0.47  | -0.03     | -0.29  | 0.24  | 0.00      | -0.25  | 0.25  | 0.25      | -0.05  | 0.55  | 0.01    | -0.27  | 0.30  |
| Outdoor venues open                | 0.69      | 0.15   | 1.23  | 0.56      | 0.31   | 0.82  | 0.49      | 0.26   | 0.73  | 0.66      | 0.38   | 0.94  | 0.56    | 0.33   | 0.79  |
| Schools open                       | 0.55      | -0.10  | 1.21  | 0.10      | -0.20  | 0.40  | 0.22      | -0.06  | 0.49  | 0.18      | -0.07  | 0.44  | 0.23    | -0.03  | 0.49  |
| Risk of infection (15% vs 5%)      | -1.15     | -1.87  | -0.43 | -1.34     | -1.79  | -0.89 | -1.11     | -1.48  | -0.74 | -1.14     | -1.52  | -0.76 | -1.31   | -1.70  | -0.91 |
| Risk of infection (30% vs 5%)      | -3.96     | -5.77  | -2.14 | -4.12     | -5.16  | -3.09 | -3.15     | -4.00  | -2.30 | -3.47     | -4.32  | -2.63 | -3.38   | -4.12  | -2.64 |

S4 Table & Figure: Main utilities by gender

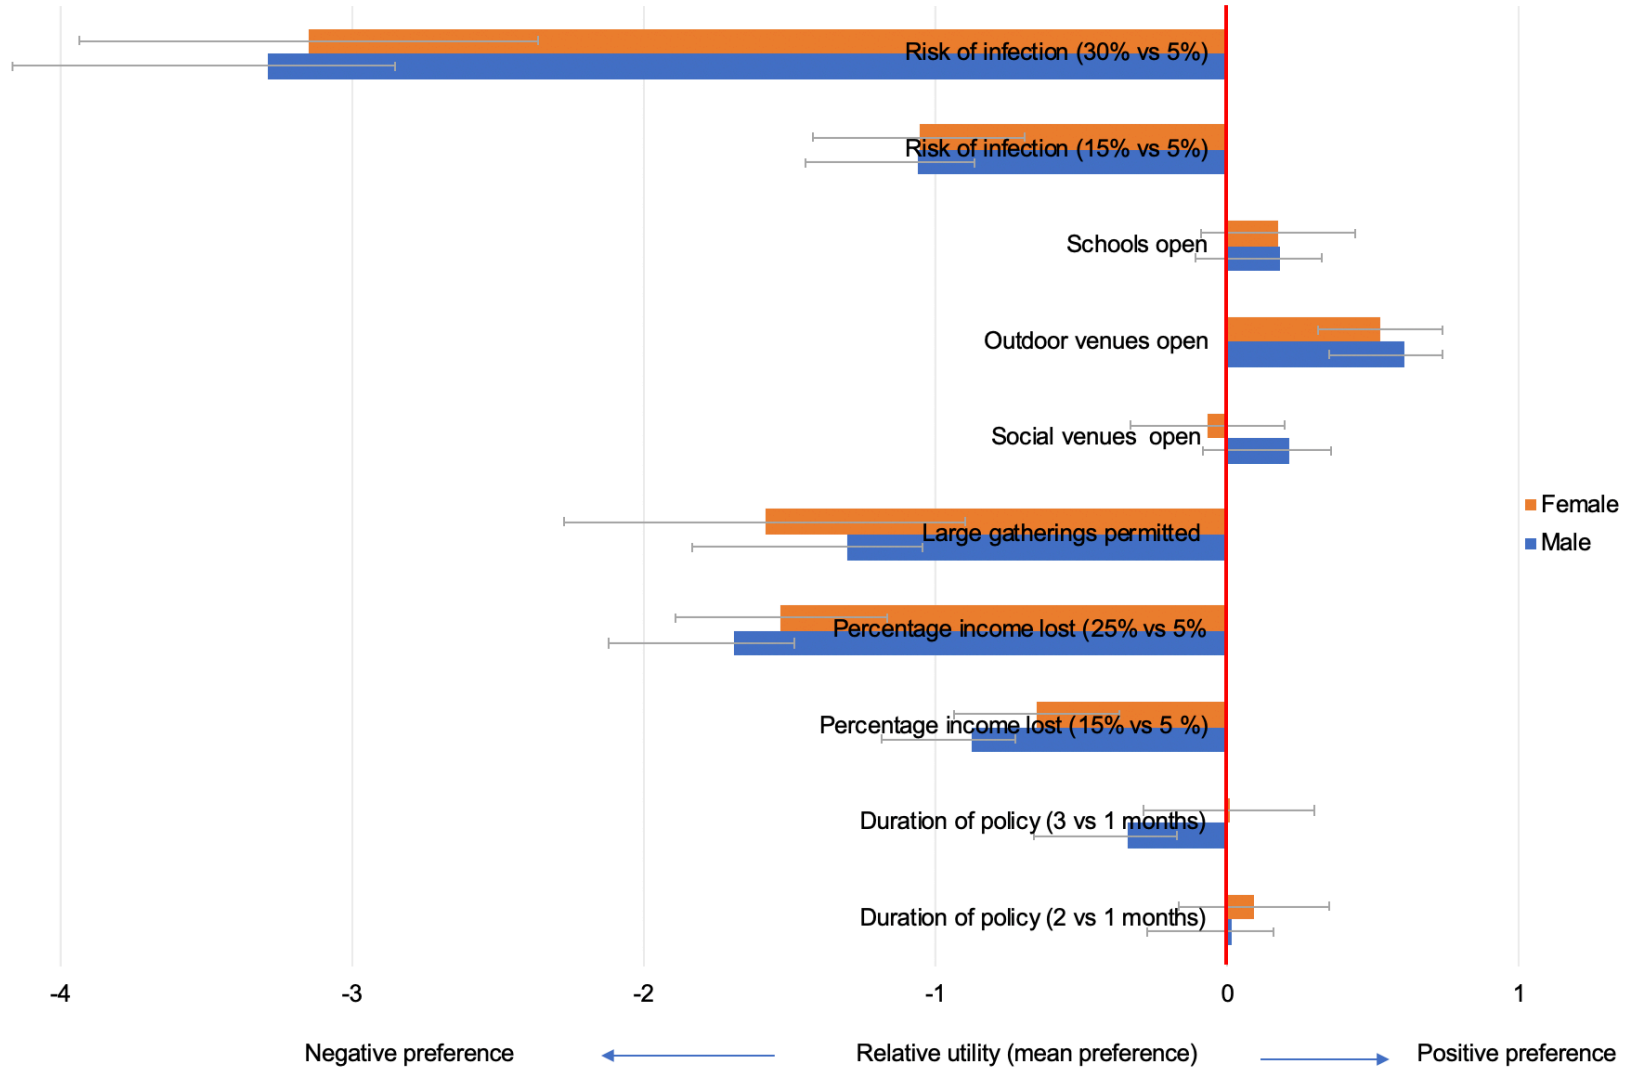

| Attribute                           | Male    |        |       | Female  |        |       |
|-------------------------------------|---------|--------|-------|---------|--------|-------|
|                                     | Utility | 95% CI |       | Utility | 95% CI |       |
| Duration of policy (2 vs 1 months)  | 0.01    | -0.24  | 0.27  | 0.09    | -0.05  | 0.24  |
| Duration of policy (3 vs 1 months)  | -0.34   | -0.63  | -0.05 | 0.01    | -0.16  | 0.17  |
| Percentage income lost (15% vs 5 %) | -0.88   | -1.16  | -0.60 | -0.66   | -0.81  | -0.50 |
| Percentage income lost (25% vs 5%   | -1.70   | -2.06  | -1.33 | -1.53   | -1.74  | -1.32 |
| Large gatherings permitted          | -1.31   | -2.00  | -0.62 | -1.59   | -1.85  | -1.32 |
| Social venues open                  | 0.21    | -0.06  | 0.47  | -0.07   | -0.22  | 0.08  |
| Outdoor venues open                 | 0.61    | 0.39   | 0.82  | 0.52    | 0.39   | 0.65  |
| Schools open                        | 0.18    | -0.09  | 0.44  | 0.17    | 0.03   | 0.32  |
| Risk of infection (15% vs 5%)       | -1.06   | -1.43  | -0.70 | -1.06   | -1.25  | -0.86 |
| Risk of infection (30% vs 5%)       | -3.29   | -4.08  | -2.50 | -3.15   | -3.59  | -2.71 |

S5 Table & Figure: Main utilities by race group

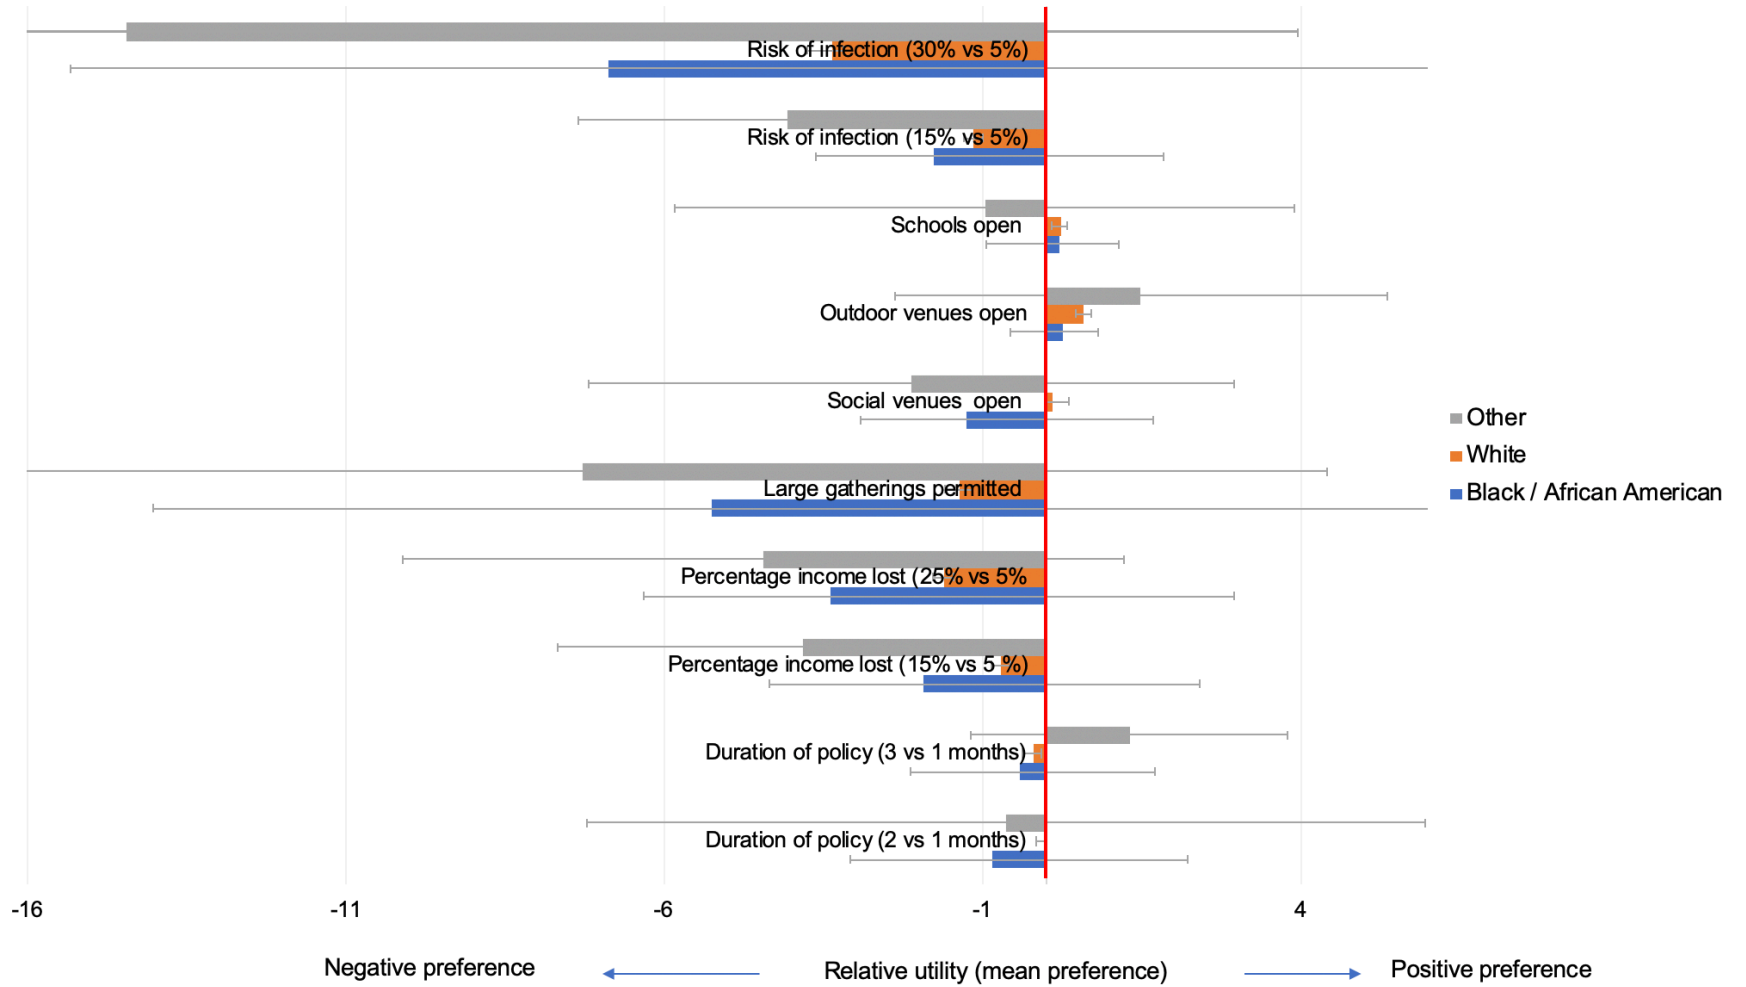



| Attribute                           | Black   |        |       | White   |        |       | Other   |        |       |
|-------------------------------------|---------|--------|-------|---------|--------|-------|---------|--------|-------|
|                                     | Utility | 95% CI |       | Utility | 95% CI |       | Utility | 95% CI |       |
| Duration of policy (2 vs 1 months)  | -0.85   | -3.09  | 1.38  | -0.02   | -0.16  | 0.11  | -0.62   | -7.21  | 5.97  |
| Duration of policy (3 vs 1 months)  | -0.40   | -2.13  | 1.32  | -0.21   | -0.36  | -0.06 | 1.31    | -1.17  | 3.79  |
| Percentage income lost (15% vs 5 %) | -1.94   | -4.36  | 0.49  | -0.72   | -0.86  | -0.58 | -3.83   | -7.69  | 0.02  |
| Percentage income lost (25% vs 5%   | -3.39   | -6.33  | -0.45 | -1.61   | -1.79  | -1.43 | -4.44   | -10.11 | 1.24  |
| Large gatherings permitted          | -5.25   | -14.05 | 3.55  | -1.35   | -1.60  | -1.10 | -7.28   | -18.98 | 4.42  |
| Social venues open                  | -1.24   | -2.92  | 0.44  | 0.10    | -0.02  | 0.22  | -2.13   | -7.20  | 2.95  |
| Outdoor venues open                 | 0.27    | -0.55  | 1.10  | 0.59    | 0.48   | 0.70  | 1.49    | -2.37  | 5.36  |
| Schools open                        | 0.21    | -0.94  | 1.36  | 0.22    | 0.10   | 0.35  | -0.97   | -5.85  | 3.91  |
| Risk of infection (15% vs 5%)       | -1.76   | -3.62  | 0.09  | -1.13   | -1.30  | -0.96 | -4.06   | -7.36  | -0.75 |
| Risk of infection (30% vs 5%)       | -6.87   | -15.34 | 1.60  | -3.37   | -3.76  | -2.98 | -14.46  | -32.88 | 3.97  |

S6 Table & Figure: Main utilities by annual household income category

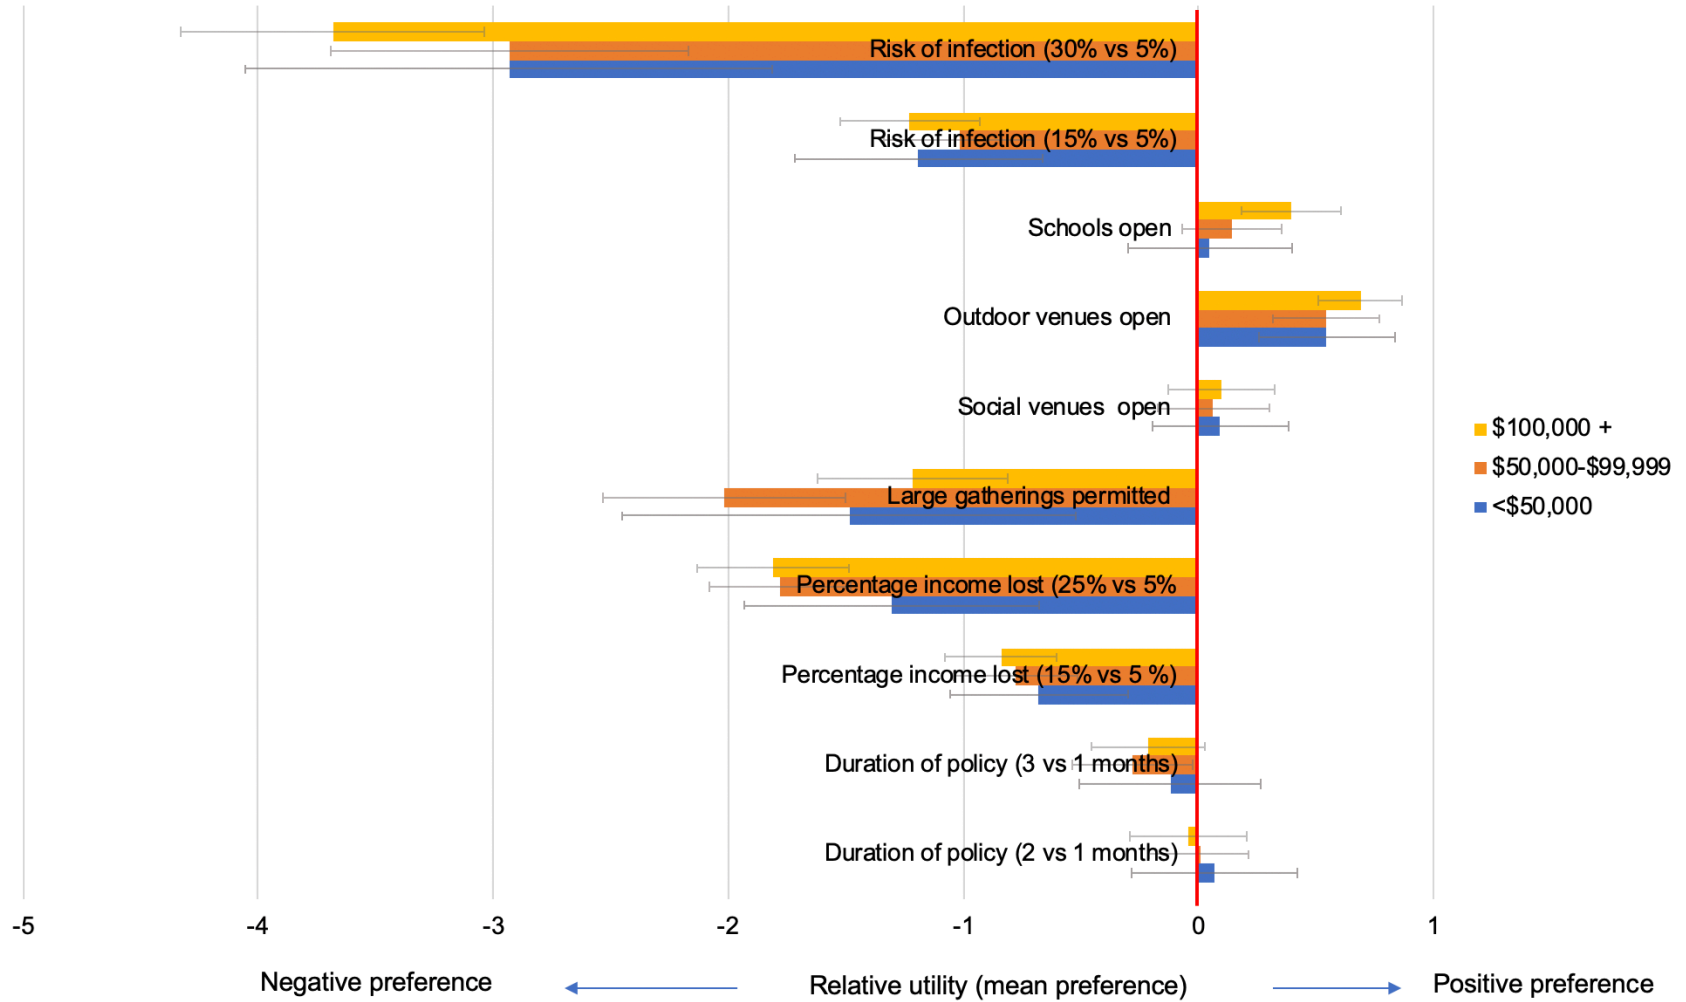

|                                     | < \$49,999 |       |       | \$50,000-\$99,999 |        |       | \$100,000 + |        |       |
|-------------------------------------|------------|-------|-------|-------------------|--------|-------|-------------|--------|-------|
| Attribute                           | utility    | 95%CI |       | utility           | 95% CI |       | utility     | 95% CI |       |
| Duration of policy (2 vs 1 months)  | 0.07       | -0.28 | 0.42  | 0.00              | -0.21  | 0.21  | -0.04       | -0.29  | 0.20  |
| Duration of policy (3 vs 1 months)  | -0.12      | -0.51 | 0.26  | -0.28             | -0.54  | -0.02 | -0.21       | -0.45  | 0.03  |
| Percentage income lost (15% vs 5 %) | -0.68      | -1.06 | -0.30 | -0.78             | -1.04  | -0.52 | -0.84       | -1.08  | -0.61 |
| Percentage income lost (25% vs 5%   | -1.31      | -1.94 | -0.68 | -1.78             | -2.08  | -1.48 | -1.81       | -2.13  | -1.49 |
| Large gatherings permitted          | -1.49      | -2.45 | -0.52 | -2.02             | -2.53  | -1.51 | -1.22       | -1.62  | -0.82 |
| Social venues open                  | 0.09       | -0.19 | 0.38  | 0.06              | -0.18  | 0.30  | 0.10        | -0.13  | 0.32  |
| Outdoor venues open                 | 0.54       | 0.25  | 0.84  | 0.54              | 0.32   | 0.77  | 0.69        | 0.51   | 0.87  |
| Schools open                        | 0.05       | -0.30 | 0.40  | 0.14              | -0.07  | 0.36  | 0.39        | 0.18   | 0.60  |
| Risk of infection (15% vs 5%)       | -1.19      | -1.72 | -0.67 | -1.02             | -1.34  | -0.70 | -1.23       | -1.53  | -0.93 |
| Risk of infection (30% vs 5%)       | -2.93      | -4.05 | -1.81 | -2.93             | -3.69  | -2.17 | -3.68       | -4.33  | -3.04 |

S7 Table & Figure: Main utilities by comorbid illness category

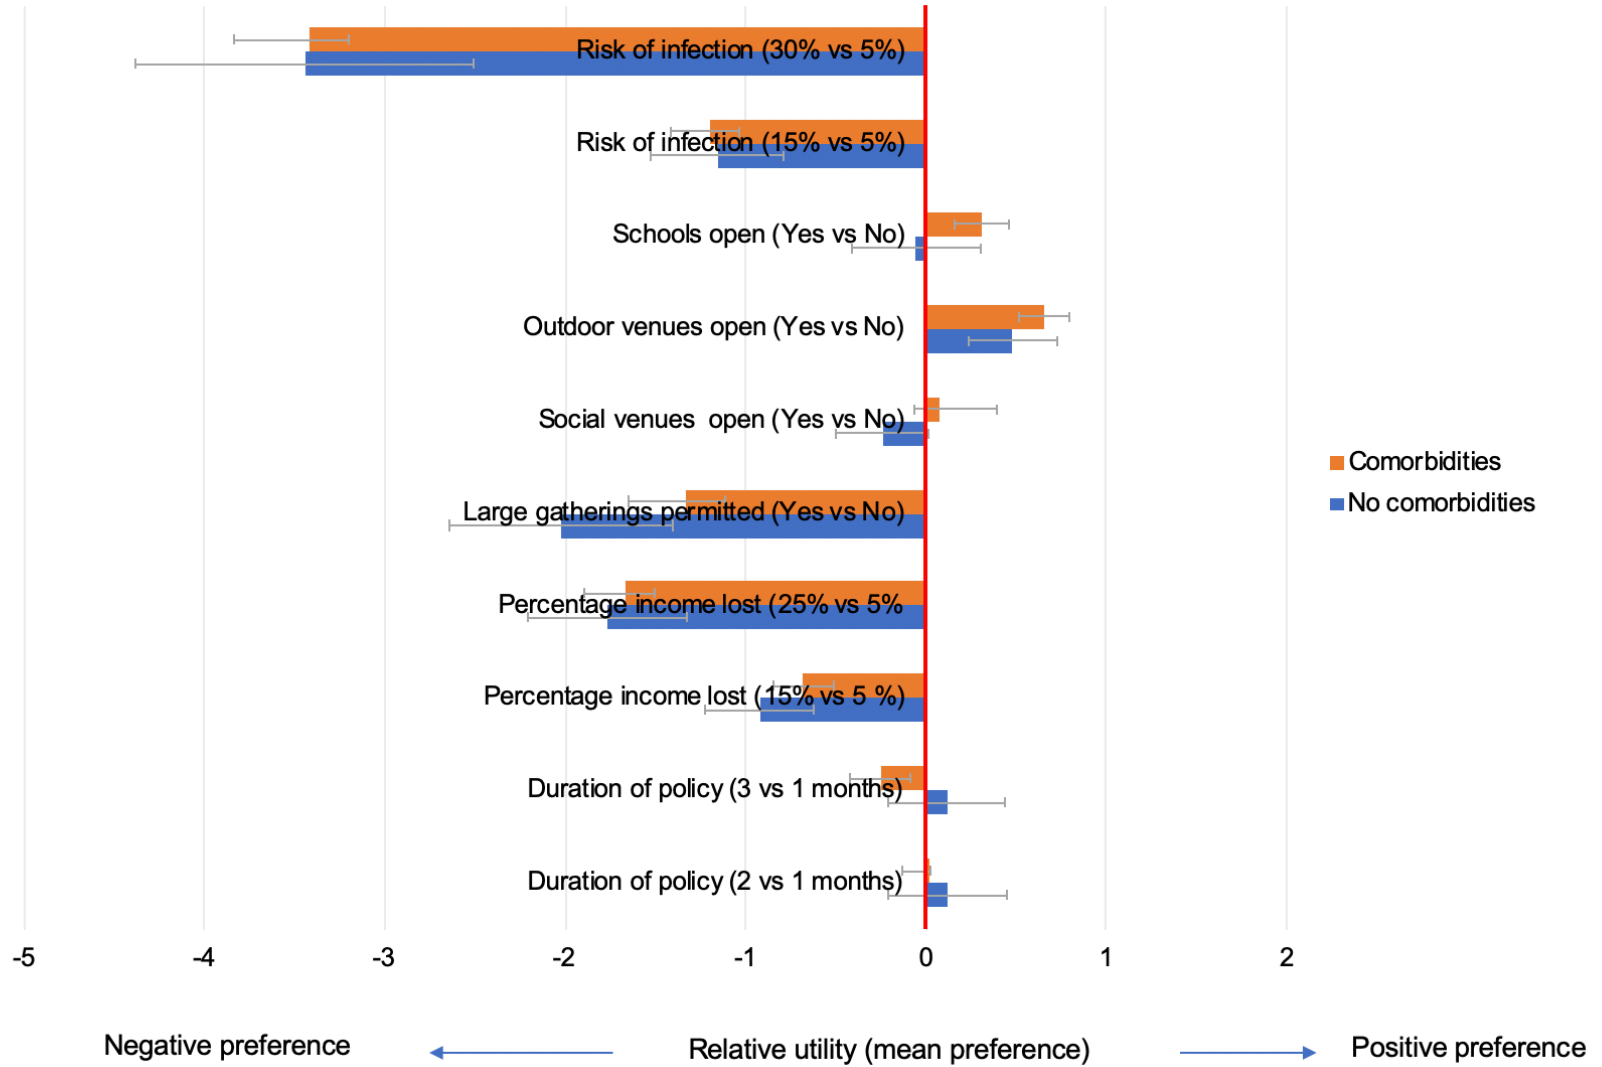

| Attribute                           | Comorbidity |       |       | No comorbidity |       |       |
|-------------------------------------|-------------|-------|-------|----------------|-------|-------|
|                                     | Utility     | 95%CI |       | Utility        | 95%CI |       |
| Duration of policy (2 vs 1 months)  | 0.12        | -0.21 | 0.44  | 0.02           | -0.13 | 0.17  |
| Duration of policy (3 vs 1 months)  | 0.12        | -0.21 | 0.44  | -0.24          | -0.42 | -0.07 |
| Percentage income lost (15% vs 5 %) | -0.92       | -1.23 | -0.62 | -0.69          | -0.85 | -0.52 |
| Percentage income lost (25% vs 5%)  | -1.77       | -2.21 | -1.32 | -1.67          | -1.89 | -1.45 |
| Large gatherings permitted          | -2.02       | -2.64 | -1.40 | -1.33          | -1.65 | -1.02 |
| Social venues open                  | -0.24       | -0.49 | 0.02  | 0.08           | -0.06 | 0.22  |
| Outdoor venues open                 | 0.48        | 0.23  | 0.72  | 0.65           | 0.51  | 0.79  |
| Schools open                        | -0.05       | -0.41 | 0.30  | 0.31           | 0.16  | 0.47  |
| Risk of infection (15% vs 5%)       | -1.16       | -1.52 | -0.79 | -1.19          | -1.41 | -0.98 |
| Risk of infection (30% vs 5%)       | -3.44       | -4.38 | -2.51 | -3.42          | -3.84 | -3.00 |

**S8 Table: Utilities by latent class membership**

| Levels                             | Altruistic |        |       | Risk takers |        |      | Risk eliminators |        |       | Risk averse educators |        |       |
|------------------------------------|------------|--------|-------|-------------|--------|------|------------------|--------|-------|-----------------------|--------|-------|
|                                    | Utility    | 95% CI |       | Utility     | 95% CI |      | Utility          | 95% CI |       | Utility               | 95% CI |       |
| Duration: 2 vs 1 months            | 1.26       | 0.68   | 1.84  | -0.33       | -0.66  | 0.01 | 0.08             | -0.17  | 0.33  | -0.07                 | -0.30  | 0.16  |
| Duration: 3 vs 1 months            | 1.67       | 0.98   | 2.36  | -0.90       | -1.30  | 0.50 | 0.13             | -0.12  | 0.39  | -0.52                 | -0.80  | -0.24 |
| Income loss: 10% vs 5%             | -1.04      | -1.51  | -0.56 | -1.45       | -1.90  | 1.00 | -0.80            | -1.08  | -0.52 | -0.75                 | -1.01  | -0.49 |
| Income loss: 25% vs 5%             | -2.12      | -2.84  | -1.40 | -2.45       | -3.17  | 1.73 | -1.99            | -2.34  | -1.65 | -2.03                 | -2.43  | -1.63 |
| Large gatherings: permitted vs not | -2.83      | -3.87  | -1.80 | 2.19        | 1.50   | 2.87 | -2.78            | -3.30  | -2.27 | 0.22                  | -0.17  | 0.61  |
| Social venues open vs closed       | -1.73      | -2.31  | -1.16 | 1.55        | 0.99   | 2.11 | -0.69            | -0.90  | -0.47 | 0.46                  | 0.26   | 0.66  |
| Outdoor venues open vs closed      | -0.10      | -0.56  | 0.35  | 1.58        | 1.07   | 2.10 | 0.55             | 0.34   | 0.77  | 0.60                  | 0.39   | 0.80  |
| Schools open vs closed             | -2.71      | -3.39  | -2.04 | 1.38        | 0.93   | 1.84 | -0.43            | -0.63  | -0.23 | 1.33                  | 1.06   | 1.59  |
| Risk of infection 15% vs 5%        | 0.23       | -0.41  | 0.87  | -0.56       | -1.07  | 0.05 | -3.33            | -3.87  | -2.80 | -0.68                 | -0.99  | -0.36 |
| Risk of infection 30% vs 5%        | -0.53      | -1.37  | 0.32  | -0.69       | -1.46  | 0.09 | -7.77            | -8.93  | -6.62 | -3.20                 | -3.84  | -2.57 |

**S9 Table: Predictors of latent class membership (multinomial logistic regression, baseline comparison group “risk eliminators”)**

| Characteristic     |                           | Risk averse educators (22.5%) |        |      |         | Altruistic (14.9%) |        |      |         | Risk-takers (13.7%) |        |      |         |
|--------------------|---------------------------|-------------------------------|--------|------|---------|--------------------|--------|------|---------|---------------------|--------|------|---------|
|                    |                           | RRR                           | 95% CI |      | p-value | RRR                | 95% CI |      | p-value | RRR                 | 95% CI |      | p-value |
| <b>Gender</b>      | <b>Female</b>             | 1.00                          |        |      |         | 1.00               |        |      |         | 1.00                |        |      |         |
|                    | <b>Male</b>               | 1.12                          | 0.84   | 1.49 | 0.455   | 1.09               | 0.75   | 1.58 | 0.660   | 2.19                | 1.54   | 3.12 | <0.001  |
| <b>Age</b>         | <b>18-24yrs</b>           | 1.00                          |        |      |         | 1.00               |        |      |         | 1.00                |        |      |         |
|                    | <b>25-34yrs</b>           | 0.98                          | 0.54   | 1.78 |         | 1.37               | 0.63   | 2.94 |         | 0.60                | 0.28   | 1.27 |         |
|                    | <b>35-49yrs</b>           | 0.68                          | 0.37   | 1.25 | 0.317   | 1.60               | 0.75   | 3.40 | 0.674   | 0.84                | 0.40   | 1.77 | 0.057   |
|                    | <b>50-64yrs</b>           | 0.87                          | 0.48   | 1.56 |         | 1.58               | 0.69   | 3.58 |         | 1.23                | 0.57   | 2.65 |         |
|                    | <b>65yrs +</b>            | 0.71                          | 0.38   | 1.33 |         | 1.23               | 0.57   | 2.65 |         | 0.65                | 0.29   | 1.43 |         |
| <b>Income</b>      | <b>&lt; \$50,000</b>      | 1.00                          |        |      |         | 1.00               |        |      |         | 1.00                |        |      |         |
|                    | <b>50,000 &lt; 99,000</b> | 1.41                          | 0.93   | 2.14 | 0.102   | 0.69               | 0.43   | 1.11 | 0.123   | 0.96                | 0.58   | 1.61 | 0.887   |
|                    | <b>\$100,000 +</b>        | 1.49                          | 0.99   | 2.25 |         | 0.70               | 0.44   | 1.10 |         | 0.93                | 0.56   | 1.55 |         |
| <b>Race</b>        | <b>White</b>              | 1.00                          |        |      |         | 1.00               |        |      |         | 1.00                |        |      |         |
|                    | <b>Black</b>              | 0.88                          | 0.44   | 1.76 | 0.679   | 0.77               | 0.34   | 1.72 | 0.333   | 0.58                | 0.18   | 1.82 | 0.628   |
|                    | <b>Other</b>              | 0.76                          | 0.38   | 1.49 |         | 1.57               | 0.80   | 3.10 |         | 1.09                | 0.48   | 2.48 |         |
| <b>Comorbidity</b> | <b>No</b>                 | 1.00                          |        |      |         | 1.00               |        |      |         | 1.00                |        |      |         |
|                    | <b>Yes</b>                | 0.74                          | 0.53   | 1.02 | 0.066   | 1.14               | 0.79   | 1.64 | 0.478   | 0.74                | 0.47   | 1.16 | 0.194   |

Footnotes: Baseline comparison class: risk eliminators (48.9% of population)





| 6/2  | 7/1  | 7/2  | 7/3  |      |      |      |      |  |  |
|------|------|------|------|------|------|------|------|--|--|
| 1/1  |      | 1200 | 0    | 0    | 400  | 401  | 399  |  |  |
| 600  | 600  | 600  | 600  | 599  | 601  | 601  |      |  |  |
| 599  | 391  | 415  | 394  |      |      |      |      |  |  |
| 1/2  |      | 0    | 1200 | 0    | 401  | 398  | 401  |  |  |
| 600  | 600  | 599  | 601  | 600  | 600  | 601  |      |  |  |
| 599  | 394  | 414  | 392  |      |      |      |      |  |  |
| 1/3  |      | 0    | 0    | 1200 | 399  | 400  | 401  |  |  |
| 599  | 601  | 601  | 599  | 601  | 599  | 598  |      |  |  |
| 602  | 393  | 416  | 391  |      |      |      |      |  |  |
| 2/1  |      | 400  | 401  | 399  | 1200 | 0    | 0    |  |  |
| 598  | 602  | 599  | 601  | 600  | 600  | 602  |      |  |  |
| 598  | 391  | 418  | 391  |      |      |      |      |  |  |
| 2/2  |      | 401  | 398  | 400  | 0    | 1199 | 0    |  |  |
| 600  | 599  | 600  | 599  | 600  | 599  | 598  |      |  |  |
| 601  | 391  | 414  | 394  |      |      |      |      |  |  |
| 2/3  |      | 399  | 401  | 401  | 0    | 0    | 1201 |  |  |
| 601  | 600  | 601  | 600  | 600  | 601  | 600  |      |  |  |
| 601  | 396  | 413  | 392  |      |      |      |      |  |  |
| 3/1  |      | 600  | 600  | 599  | 598  | 600  | 601  |  |  |
| 1799 | 0    | 899  | 900  | 898  | 901  | 899  |      |  |  |
| 900  | 1178 | 621  | 0    |      |      |      |      |  |  |
| 3/2  |      | 600  | 600  | 601  | 602  | 599  | 600  |  |  |
| 0    | 1801 | 901  | 900  | 902  | 899  | 901  |      |  |  |
| 900  | 0    | 624  | 1177 |      |      |      |      |  |  |
| 4/1  |      | 600  | 599  | 601  | 599  | 600  | 601  |  |  |
| 899  | 901  | 1800 | 0    | 900  | 900  | 897  |      |  |  |
| 903  | 588  | 622  | 590  |      |      |      |      |  |  |
| 4/2  |      | 600  | 601  | 599  | 601  | 599  | 600  |  |  |
| 900  | 900  | 0    | 1800 | 900  | 900  | 903  |      |  |  |
| 897  | 590  | 623  | 587  |      |      |      |      |  |  |
| 5/1  |      | 599  | 600  | 601  | 600  | 600  | 600  |  |  |
| 898  | 902  | 900  | 900  | 1800 | 0    | 901  |      |  |  |
| 899  | 589  | 622  | 589  |      |      |      |      |  |  |
| 5/2  |      | 601  | 600  | 599  | 600  | 599  | 601  |  |  |
| 901  | 899  | 900  | 900  | 0    | 1800 | 899  |      |  |  |
| 901  | 589  | 623  | 588  |      |      |      |      |  |  |
| 6/1  |      | 601  | 601  | 598  | 602  | 598  | 600  |  |  |
| 899  | 901  | 897  | 903  | 901  | 899  | 1800 |      |  |  |
| 0    | 589  | 624  | 587  |      |      |      |      |  |  |
| 6/2  |      | 599  | 599  | 602  | 598  | 601  | 601  |  |  |
| 900  | 900  | 903  | 897  | 899  | 901  | 0    |      |  |  |
| 1800 | 589  | 621  | 590  |      |      |      |      |  |  |
| 7/1  |      | 391  | 394  | 393  | 391  | 391  | 396  |  |  |
| 1178 | 0    | 588  | 590  | 589  | 589  | 589  |      |  |  |
| 589  | 1178 | 0    | 0    |      |      |      |      |  |  |
| 7/2  |      | 415  | 414  | 416  | 418  | 414  | 413  |  |  |
| 621  | 624  | 622  | 623  | 622  | 623  | 624  |      |  |  |
| 621  | 0    | 1245 | 0    |      |      |      |      |  |  |
| 7/3  |      | 394  | 392  | 391  | 391  | 394  | 392  |  |  |

|     |      |     |      |     |     |     |
|-----|------|-----|------|-----|-----|-----|
| 0   | 1177 | 590 | 587  | 589 | 588 | 587 |
| 590 | 0    | 0   | 1177 |     |     |     |

This counting test reports how balanced the design is in terms of frequencies. To assess how precisely this design can estimate utilities given your expected sample size, we recommend you refer to the Test Design report (the Logit Efficiency Test Using Simulated Data).

Logit Efficiency Test Using Simulated Data

---

Main Effects: 1 2 3 4 5 6 7  
 Build includes 600 respondents.

Total number of choices in each response category:

| Category | Number | Percent |
|----------|--------|---------|
| 1        | 1817   | 50.47%  |
| 2        | 1783   | 49.53%  |

There are 3600 expanded tasks in total, or an average of 6.0 tasks per respondent.

```

Iter 1 Log-likelihood = -2490.30855 Chi Sq = 10.04259 RLH = 0.50070
Iter 2 Log-likelihood = -2490.10417 Chi Sq = 10.45136 RLH = 0.50073
Iter 3 Log-likelihood = -2490.09591 Chi Sq = 10.46788 RLH = 0.50073
Iter 4 Log-likelihood = -2490.09558 Chi Sq = 10.46854 RLH = 0.50073
Iter 5 Log-likelihood = -2490.09557 Chi Sq = 10.46857 RLH = 0.50073
Iter 6 Log-likelihood = -2490.09557 Chi Sq = 10.46857 RLH = 0.50073

```

\*Converged

|   | Std Err | Attribute Level |
|---|---------|-----------------|
| 1 | 0.03036 | 1 1 time_1      |
| 2 | 0.03020 | 1 2 time_2      |
| 3 | 0.03011 | 1 3 time_3      |
| 4 | 0.03028 | 2 1 five        |
| 5 | 0.03042 | 2 2 fifteen     |
| 6 | 0.03001 | 2 3 twenty five |
| 7 | 0.03951 | 3 1 no_gather   |

|    |         |     |                 |
|----|---------|-----|-----------------|
| 8  | 0.03951 | 3 2 | yes_gather      |
| 9  | 0.01950 | 4 1 | socialvenue_yes |
| 10 | 0.01950 | 4 2 | socialvenue_no  |
| 11 | 0.01965 | 5 1 | outdoor_no      |
| 12 | 0.01965 | 5 2 | outdoor_yes     |
| 13 | 0.02013 | 6 1 | open            |
| 14 | 0.02013 | 6 2 | closed          |
| 15 | 0.05315 | 7 1 | five            |
| 16 | 0.02992 | 7 2 | fifteen         |
| 17 | 0.05339 | 7 3 | thirty          |

A general guideline is to achieve standard errors of 0.05 or smaller for main effect utilities and 0.10 or smaller for interaction effects or alternative-specific effects.

The strength of design for this model is 1479.71421  
 (The ratio of strengths of design for two designs reflects the D-Efficiency of one design relative to the other.)

**S11 Table: Weighting strategy based on Missouri population in 2019**

| Weighting strata<br>(race, gender, age<br>category) | Missouri population<br>proportion in strata | Number of DCE<br>participants in<br>strata | Proportion of<br>DCE population<br>in strata | Inverse probability<br>weight applied to<br>strata |
|-----------------------------------------------------|---------------------------------------------|--------------------------------------------|----------------------------------------------|----------------------------------------------------|
| black_fem_18_24                                     | 0.007                                       | 5                                          | 0.002                                        | 3.730                                              |
| black_fem_25_34                                     | 0.010                                       | 14                                         | 0.006                                        | 1.580                                              |
| black_fem_35_49                                     | 0.014                                       | 37                                         | 0.017                                        | 0.843                                              |
| black_fem_50_64                                     | 0.015                                       | 34                                         | 0.013                                        | 1.194                                              |
| black_fem_65                                        | 0.015                                       | 17                                         | 0.007                                        | 1.994                                              |
| black_male_18_24                                    | 0.007                                       | 3                                          | 0.001                                        | 7.717                                              |
| black_male_25_34                                    | 0.010                                       | 8                                          | 0.004                                        | 2.797                                              |
| black_male_35_49                                    | 0.014                                       | 10                                         | 0.005                                        | 2.984                                              |
| black_male_50_64                                    | 0.014                                       | 5                                          | 0.002                                        | 6.174                                              |
| black_male_65                                       | 0.012                                       | 2                                          | 0.001                                        | 12.605                                             |
| other_fem_18_24                                     | 0.005                                       | 12                                         | 0.005                                        | 1.046                                              |
| other_fem_25_34                                     | 0.008                                       | 17                                         | 0.008                                        | 1.004                                              |
| other_fem_35_49                                     | 0.011                                       | 18                                         | 0.008                                        | 1.377                                              |
| other_fem_50_64                                     | 0.012                                       | 11                                         | 0.004                                        | 3.224                                              |
| other_fem_65                                        | 0.011                                       | 6                                          | 0.002                                        | 6.150                                              |
| other_male_18_24                                    | 0.005                                       | 8                                          | 0.003                                        | 1.700                                              |
| other_male_25_34                                    | 0.008                                       | 9                                          | 0.004                                        | 1.918                                              |
| other_male_35_49                                    | 0.011                                       | 9                                          | 0.004                                        | 2.557                                              |
| other_male_50_64                                    | 0.011                                       | 6                                          | 0.003                                        | 3.968                                              |
| other_male_65                                       | 0.009                                       | 5                                          | 0.001                                        | 6.480                                              |
| white_fem_18_24                                     | 0.046                                       | 64                                         | 0.027                                        | 1.724                                              |
| white_fem_25_34                                     | 0.068                                       | 267                                        | 0.120                                        | 0.566                                              |
| white_fem_35_49                                     | 0.093                                       | 376                                        | 0.167                                        | 0.561                                              |
| white_fem_50_64                                     | 0.103                                       | 462                                        | 0.191                                        | 0.539                                              |
| white_fem_65                                        | 0.098                                       | 325                                        | 0.123                                        | 0.795                                              |
| white_male_18_24                                    | 0.047                                       | 40                                         | 0.017                                        | 2.723                                              |
| white_male_25_34                                    | 0.069                                       | 111                                        | 0.049                                        | 1.402                                              |
| white_male_35_49                                    | 0.092                                       | 119                                        | 0.050                                        | 1.818                                              |
| white_male_50_64                                    | 0.095                                       | 181                                        | 0.078                                        | 1.210                                              |
| white_male_65                                       | 0.078                                       | 191                                        | 0.078                                        | 0.994                                              |
